# Supplementary material
Source: PubMed Central journal article supplement (PMC7820712)

Supplementary Information

# Dynamics and Interactions of GPI-Linked Lynx1 Protein with/without Nicotinic Acetylcholine Receptor in Membrane Bilayers

*Chuqiao Dong<sup>1</sup>, Nathan R. Kern<sup>2</sup>, Kristin R. Anderson<sup>3</sup>, X. Frank Zhang<sup>1,4</sup>, Julie M. Miwa<sup>3</sup>, and  
Wonpil Im<sup>1,4,\*</sup>*

<sup>1</sup>Department of Mechanical Engineering and Mechanics, Lehigh University, Bethlehem, PA,  
18015, United States

<sup>2</sup>Department of Computer Science and Engineering, Lehigh University, Bethlehem, PA, 18015,  
United States

<sup>3</sup>Department of Biological Sciences, Lehigh University, Bethlehem, PA, 18015, United States

<sup>4</sup>Department of Bioengineering, Lehigh University, Bethlehem, PA, 18015, United States

Keywords: molecular modeling, molecular dynamics simulation, C-loop, structure, agonist  
sensitivity, nicotine

Corresponding author e-mail: [wonpil@lehigh.edu](mailto:wonpil@lehigh.edu)

**Figure S1.** (A-B) Time-series of root mean square deviation (RMSD) of lynx1 among three individual replicas. (C-D) Root mean square fluctuation (RMSF) of each lynx1 residue among three individual replicas.  $\beta$ -strand regions are shaded in yellow. (A, C) are for the lynx1-only system and (B, D) for the lynx1-nAChR complex system.

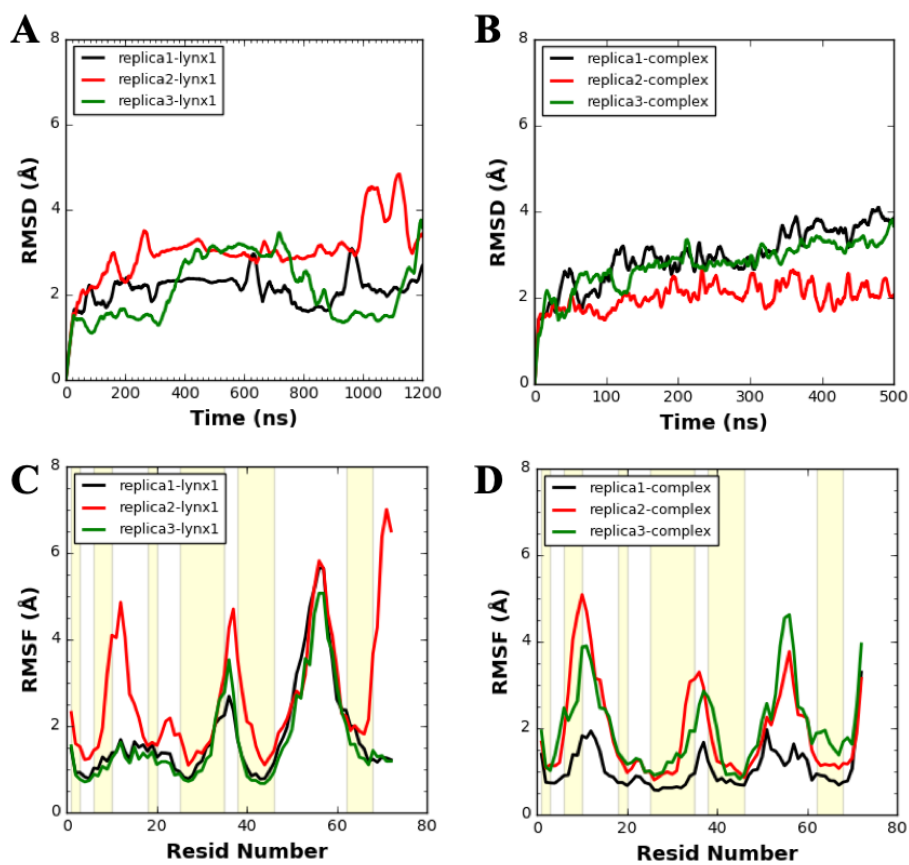

Supplement: NIHMS1660790-supplement-Supporting_Information.pdf [file NIHMS1660790-supplement-Supporting_Information.pdf]
